# Supplementary material for: Neonate Bloodstream Infections in Organization for Economic Cooperation and Development Countries: An Update on Epidemiology and Prevention
Source: PubMed Central journal article supplement (PMC6832148; doi:10.3390/jcm8101750), 2019-10-21
Supplement: jcm-08-01750-s001.pdf [file jcm-08-01750-s001.pdf]

Table S1, Supplementary material: The study selection process and search strategy.

| Country            | Preselection, No of records                                                       |                                                                    | Proper selection:<br>review of titles and<br>abstracts | Qualified for<br>this review |
|--------------------|-----------------------------------------------------------------------------------|--------------------------------------------------------------------|--------------------------------------------------------|------------------------------|
|                    | searching database with keywords:<br>„neonatal bloodstream infection”+<br>country | searching database with<br>keywords<br>„neonatal sepsis” + country |                                                        |                              |
| Australia          | 39                                                                                | 277                                                                | 12                                                     | 3                            |
| Austria            | 8                                                                                 | 48                                                                 | 3                                                      | 1                            |
| Belgium            | 20                                                                                | 57                                                                 | 3                                                      | 1                            |
| Canada             | 61                                                                                | 241                                                                | 11                                                     | 1                            |
| Chile              | 7                                                                                 | 25                                                                 | 1                                                      | 1                            |
| The Czech Republic | 0                                                                                 | 19                                                                 | 0                                                      | 0                            |
| Denmark            | 16                                                                                | 36                                                                 | 4                                                      | 2                            |
| Estonia            | 5                                                                                 | 15                                                                 | 3                                                      | 1                            |
| Finland            | 17                                                                                | 34                                                                 | 2                                                      | 1                            |
| France             | 46                                                                                | 166                                                                | 9                                                      | 2                            |
| Germany            | 51                                                                                | 207                                                                | 11                                                     | 2                            |
| Greece             | 15                                                                                | 61                                                                 | 4                                                      | 1                            |
| Hungary            | 9                                                                                 | 10                                                                 | 1                                                      | 0                            |
| Iceland            | 2                                                                                 | 1                                                                  | 0                                                      | 0                            |
| Ireland            | 8                                                                                 | 48                                                                 | 1                                                      | 1                            |
| Israel             | 25                                                                                | 143                                                                | 10                                                     | 3                            |
| Italy              | 55                                                                                | 266                                                                | 9                                                      | 1                            |
| Japan              | 29                                                                                | 76                                                                 | 4                                                      | 1                            |
| Korea              | 12                                                                                | 60                                                                 | 3                                                      | 1                            |
| Latvia             | 1                                                                                 | 1                                                                  | 0                                                      | 0                            |
| Lithuania          | 2                                                                                 | 4                                                                  | 0                                                      | 0                            |

|                              |     |     |    |   |
|------------------------------|-----|-----|----|---|
| Luxembourg                   | 0   | 1   | 0  | 0 |
| Mexico                       | 12  | 42  | 2  | 1 |
| The Netherlands              | 36  | 209 | 10 | 1 |
| New Zealand                  | 6   | 49  | 4  | 2 |
| Norway                       | 9   | 40  | 3  | 2 |
| Poland                       | 11  | 31  | 3  | 2 |
| Portugal                     | 10  | 24  | 0  | 0 |
| The Slovak Republic          | 1   | 0   | 0  | 0 |
| Slovenia                     | 1   | 6   | 0  | 0 |
| Spain                        | 32  | 146 | 8  | 1 |
| Sweden                       | 14  | 82  | 4  | 1 |
| Switzerland                  | 18  | 97  | 3  | 1 |
| Turkey                       | 29  | 224 | 9  | 1 |
| The United Kingdom           | 68  | 250 | 14 | 1 |
| The United States of America | 247 | 953 | 48 | 2 |
